# Supplementary material
Source: PubMed Central journal article supplement (PMC4125408)
Supplement: 5c45dce828337033cf658250d307da07_genetics.114.163931-12.pdf [file 5c45dce828337033cf658250d307da07_genetics.114.163931-12.pdf]

**Table S3** Molecular markers used for map-based cloning of *sped1-D* gene.

| Molecular Marker | Forward primer (F)       | Reverse primer (R)       |
|------------------|--------------------------|--------------------------|
| RM5957           | ACTGCTGCACTGCACAAGAC     | AGCTAGCTAGGCGTGAGCTG     |
| RM3287           | GGACGGATTGTAGGTAGGAC     | CCTTTCTTCAATCTGCATTG     |
| RM275            | GCATTGATGTGCCAATCG       | CATTGCAACATCTTCAACATCC   |
| RM20384          | TCAGATCACTGTGCTCCAATCC   | TCTATCTATCATGCCGACCTTG   |
| RM20297          | TTGGCACGGCCATATAACAAGC   | AAGTTGATGGCCTTTGGTTTGC   |
| RM20311          | ATAATTCATCCGGCCACCAACACC | CTCCGGGACAAGGTTGCTGAGG   |
| RM20315          | CGTCCTCCAGGAAACCCTGTAAGC | CAGAAACTCGCCGAAGCAGAGC   |
| RM1340           | TCCAAACTAGTGGGAACGC      | CTCAACGCCATGAACCTC       |
| RM20303          | ACCTCCGCGTCGTAGAAGTAGC   | CAAACCCAAACCCAAGGAGAGG   |
| CSP1             | AGGCTTCTTGAATGGAAGTGC    | GGAATATACGTGGATGTGAGAGG  |
| CSP4             | AGCGTCCTTCTCCATCAT       | TTTGTCACTTGTCCCCTA       |
| CSP7             | TGTGACAGCATAGGAGTG       | AGGAGTAGCTTTTGGTTC       |
| CSP8             | ACGCCTCTCCTTACAGCT       | GTATTCCCCTCTCCAGTACG     |
| CSP25            | TGCCAGTGCCAGCCATCAAAC    | GCCAAGCCGGTGCAGCAG       |
| CSP30            | CAATTGCGGCCCTATGAT       | GGCGGCCGAGCTGGTGGAC      |
| CSP320B          | CAATGAGGGAGGTTTATCAGC    | CCAAACAGTGGCATAGCATCCTTT |
