# Supplementary material
Source: PubMed Central journal article supplement (PMC4125408)
Supplement: 54a42bc53b4cca361dc2b9806d85b3e0_genetics.114.163931-8.pdf [file 54a42bc53b4cca361dc2b9806d85b3e0_genetics.114.163931-8.pdf]

**Table S1** Nine plant hormones that were examined to determine the effects of hormones on the elongation of *sped1-D*'s pedicels and peduncles.

| Phytohormone    | Concentration                | Panicle type      |
|-----------------|------------------------------|-------------------|
| IAA             | 20mg/L and 150mg/L           | Clustered panicle |
| ZT              | 20mg/L and 150mg/L           | Clustered panicle |
| ABA             | 20mg/L and 150mg/L           | Clustered panicle |
| 6-BA            | 20mg/L and 150mg/L           | Clustered panicle |
| NAA             | 20mg/L and 150mg/L           | Clustered panicle |
| Epibrassinolide | 0.01mg / L                   | Clustered panicle |
| Cytokinin       | 0.001g/L                     | Clustered panicle |
| 2, 4-D          | 40ppm, 80ppm, 120ppm, 160ppm | Clustered panicle |
| GA3             | 50mg/L, 100mg/L, 150mg/L     | Clustered panicle |
