# Supplementary material
Source: PubMed Central journal article supplement (PMC4125408)
Supplement: 96af82e19a3944e9f4617bf68e33c0bc_genetics.114.163931-5.pdf [file 96af82e19a3944e9f4617bf68e33c0bc_genetics.114.163931-5.pdf]

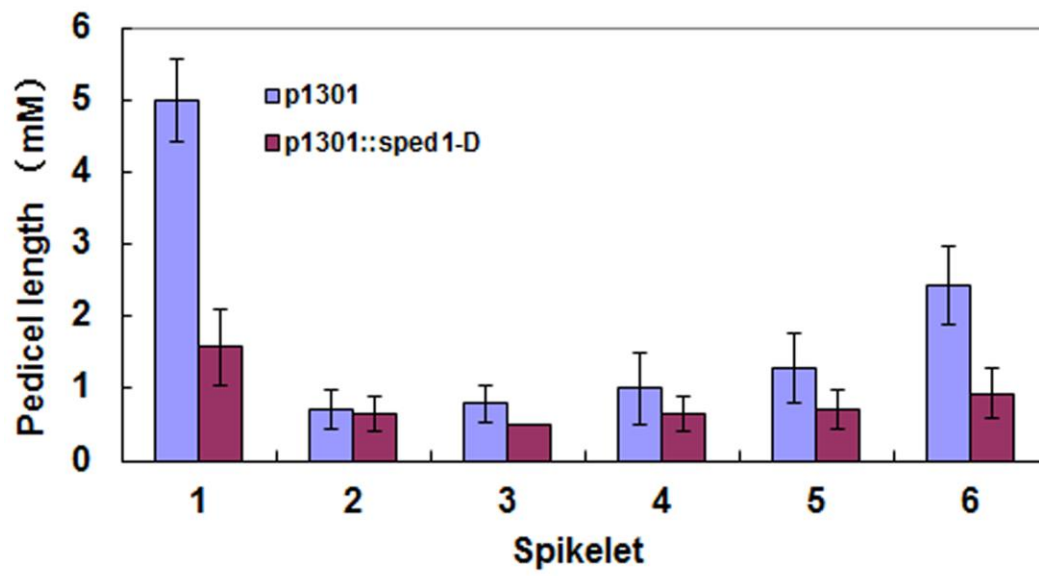

**Figure S3** Statistical analysis of the lengths of six pedicels on secondary branches of a TP309 plant containing p1301-*sped1-D*. Error bars indicate standard error (SE) for seven replicate experiments.
