# Supplementary material
Source: PubMed Central journal article supplement (PMC4125408)
Supplement: 374f73ba730555685b8ebb2467e06d0e_genetics.114.163931-10.pdf [file 374f73ba730555685b8ebb2467e06d0e_genetics.114.163931-10.pdf]

# Phyre2

|               |                              |
|---------------|------------------------------|
| Email         | ghjiang@genetics.ac.cn       |
| Description   | Undefined                    |
| Date          | Mon Feb 24 07:44:31 GMT 2014 |
| Unique Job ID | e3f47ced5611eb85             |

## Secondary structure and disorder prediction

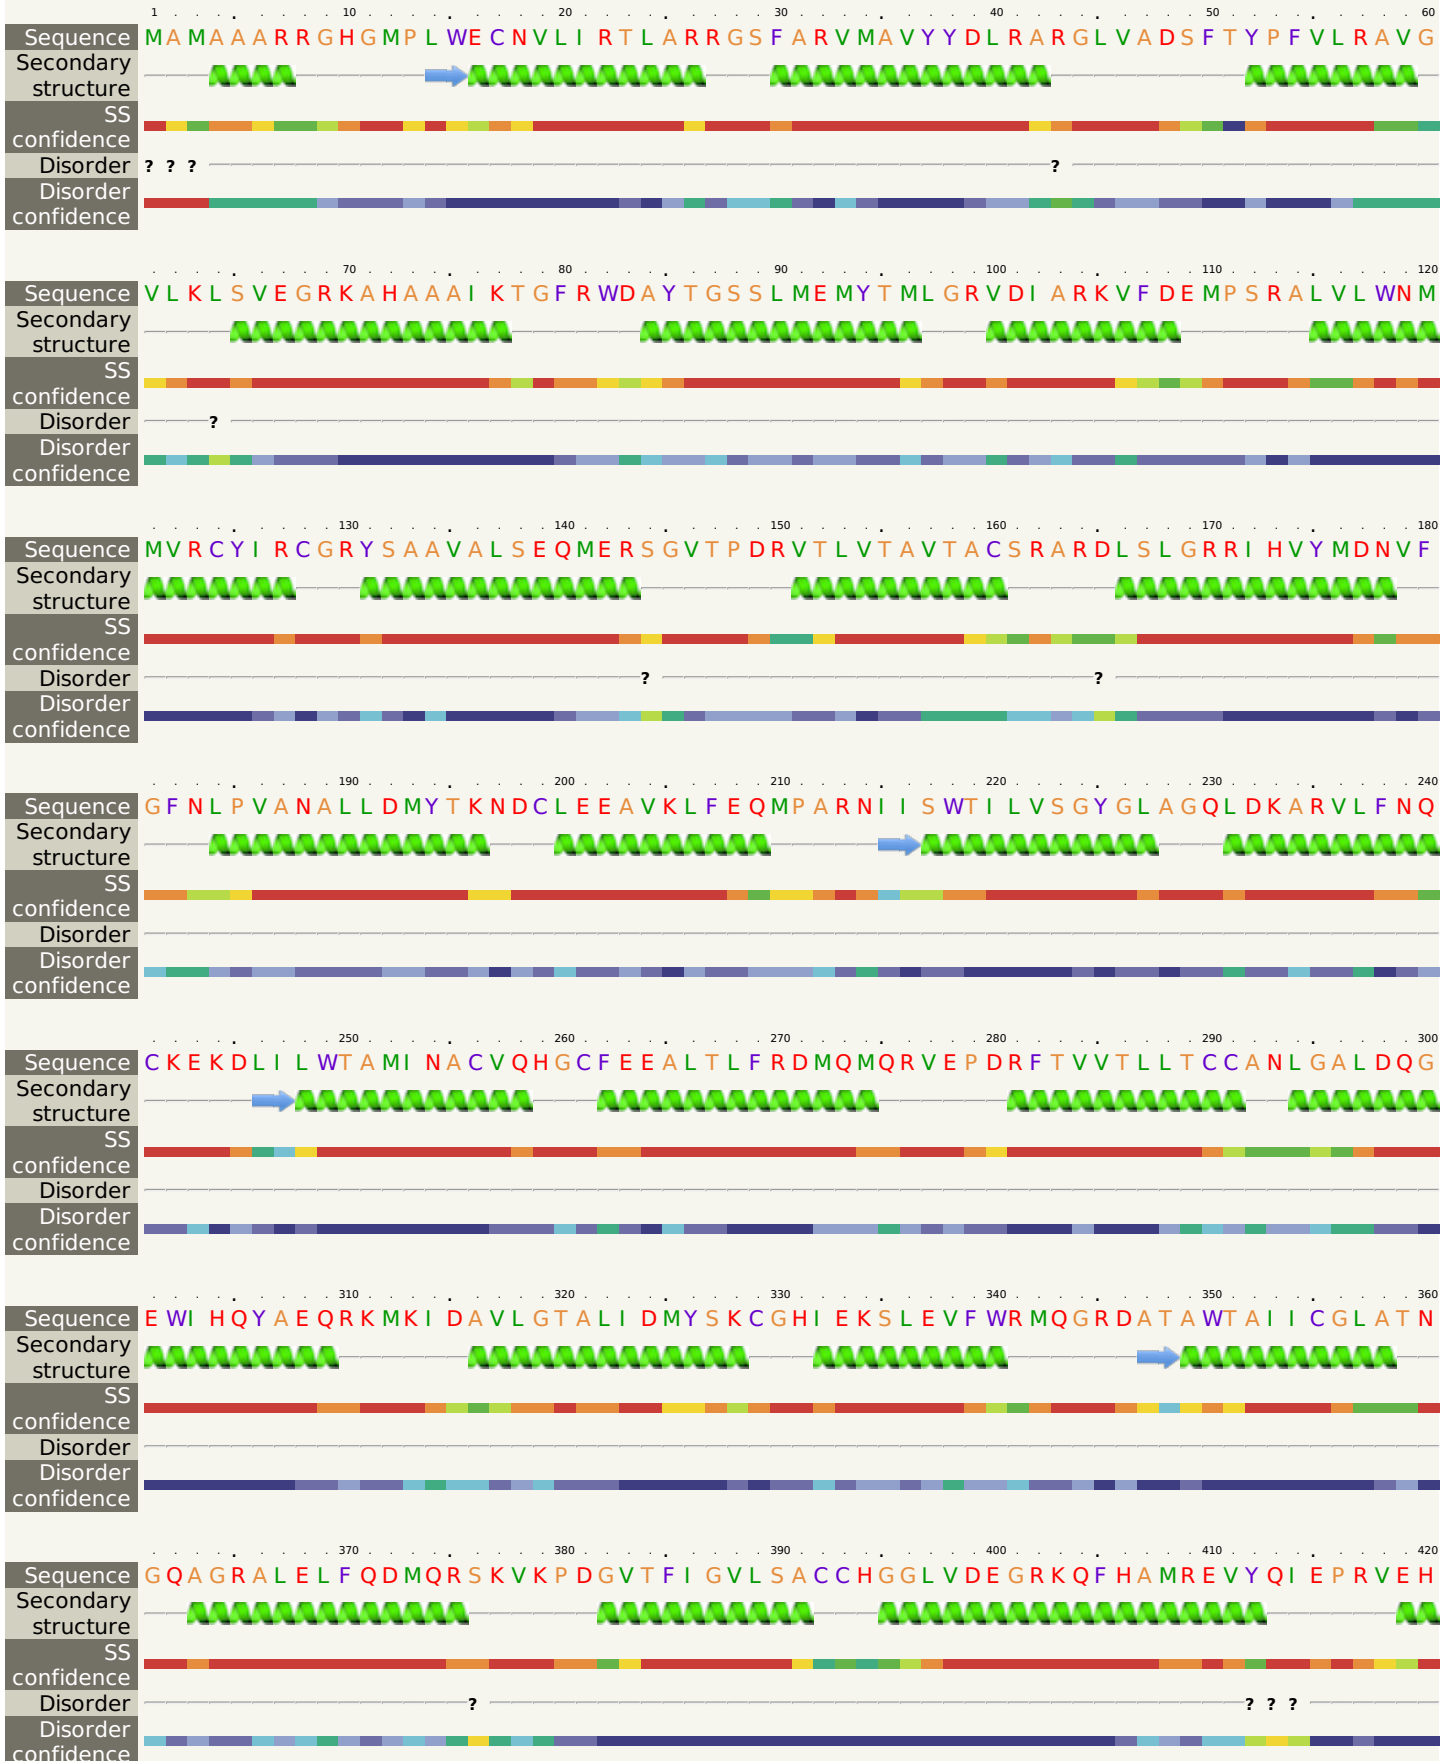

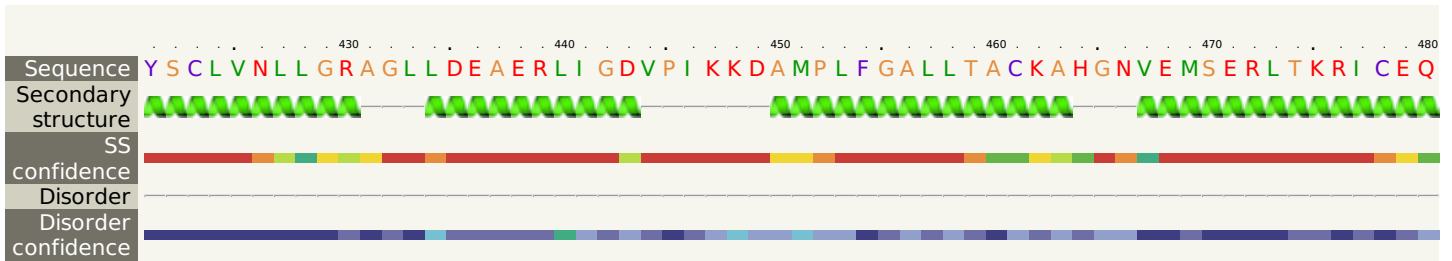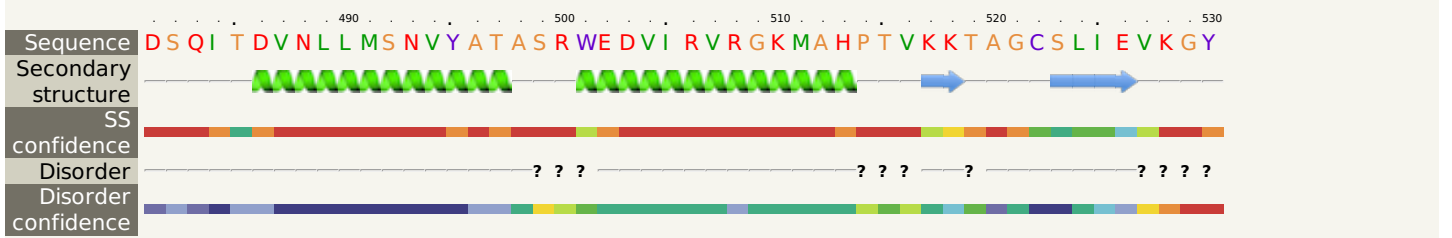

Confidence Key

High(9) Low (0)

? Disordered ( 4%)

Alpha helix ( 68%)

Beta strand ( 3%)
