# Supplementary material
Source: PubMed Central journal article supplement (PMC4125408)
Supplement: 723eccba4c9d916431e10d4e7965aeab_genetics.114.163931-16.pdf [file 723eccba4c9d916431e10d4e7965aeab_genetics.114.163931-16.pdf]

# Phyre2

|               |                              |
|---------------|------------------------------|
| Email         | ghjiang@genetics.ac.cn       |
| Description   | Undefined                    |
| Date          | Mon Feb 24 03:26:21 GMT 2014 |
| Unique Job ID | 1856bbbc54394df5             |

## Secondary structure and disorder prediction

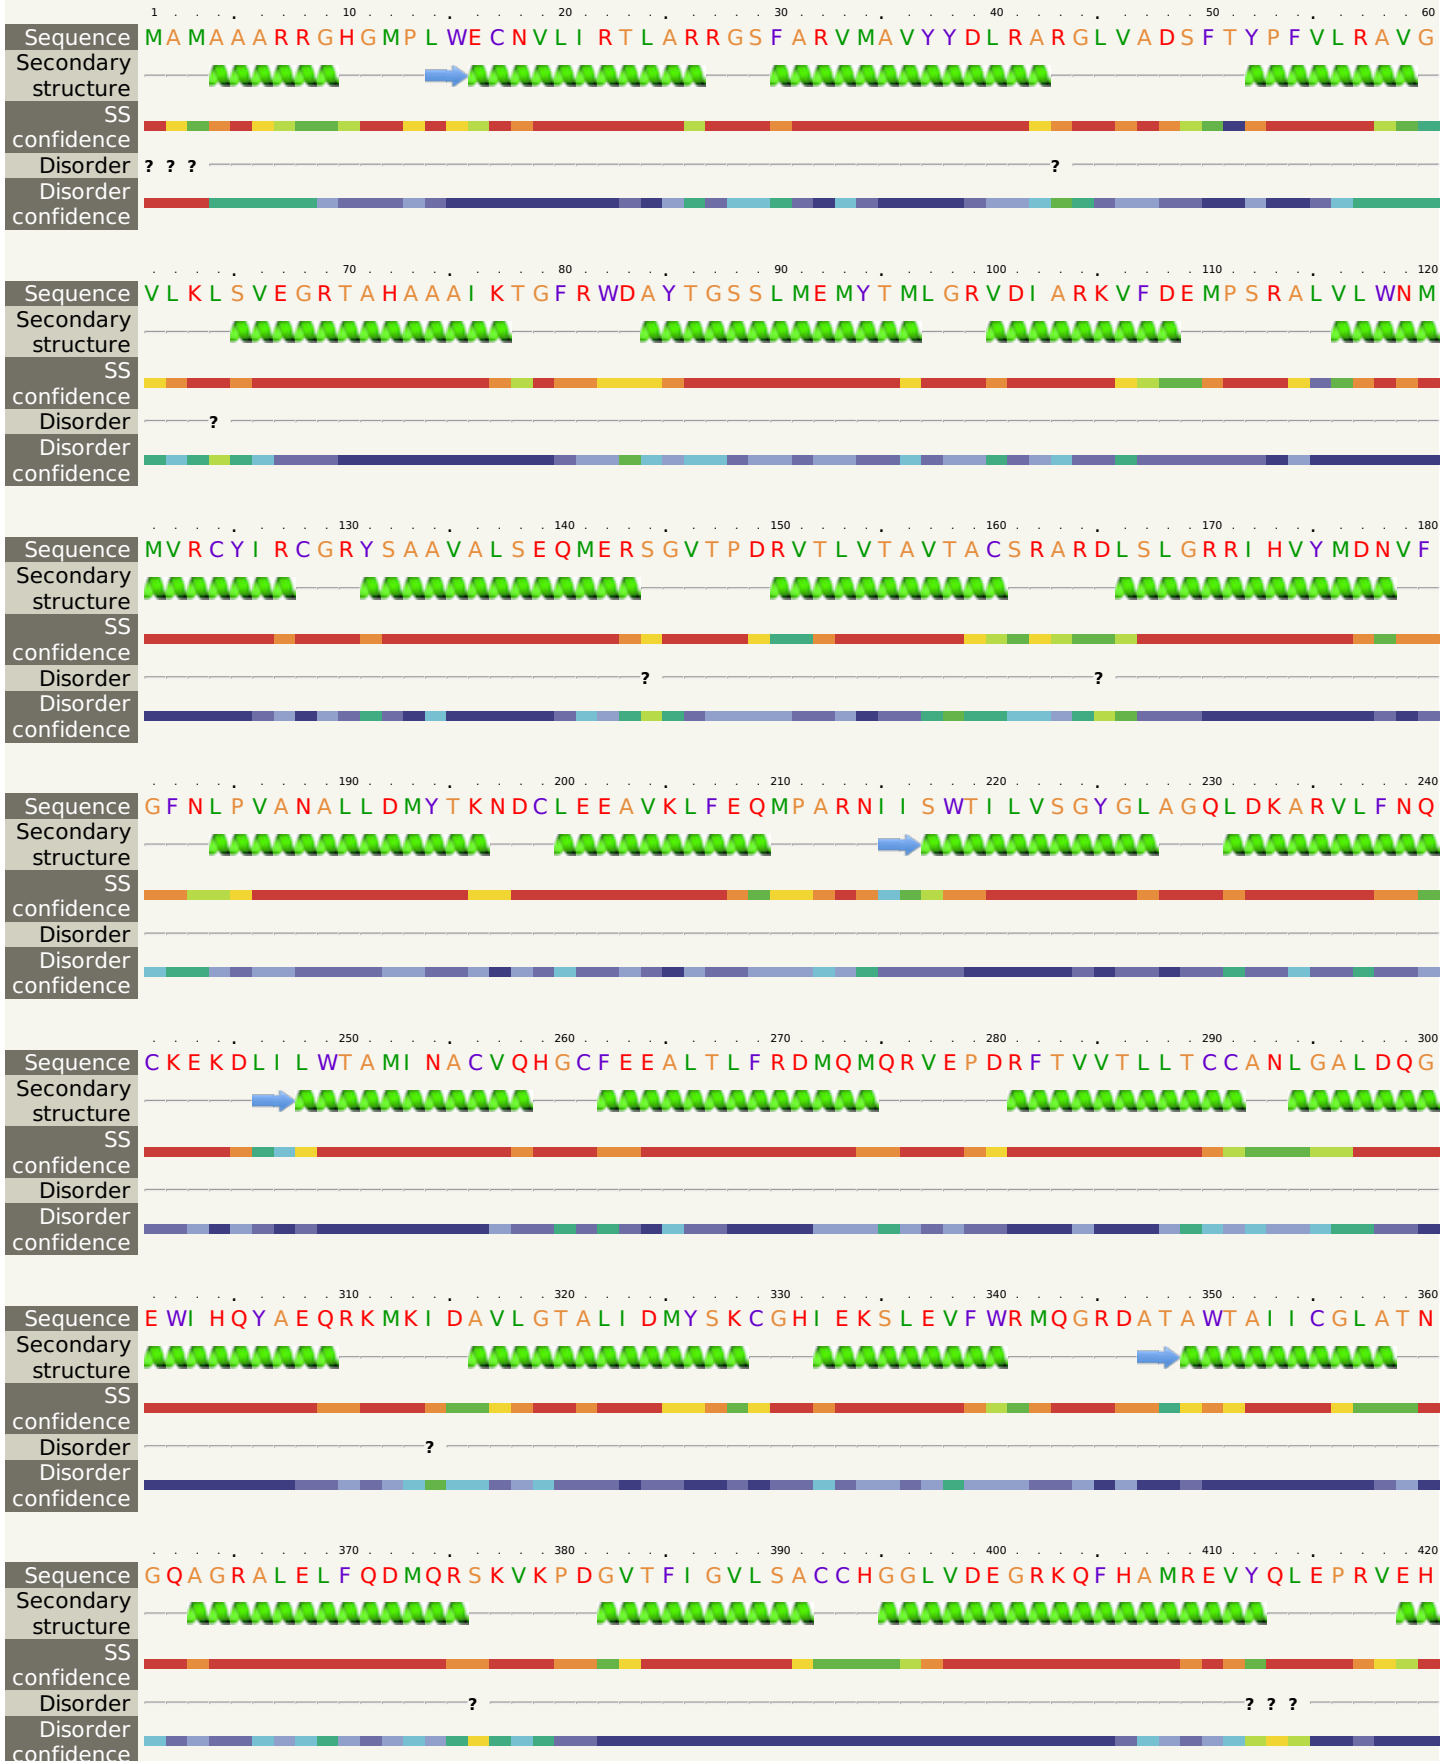

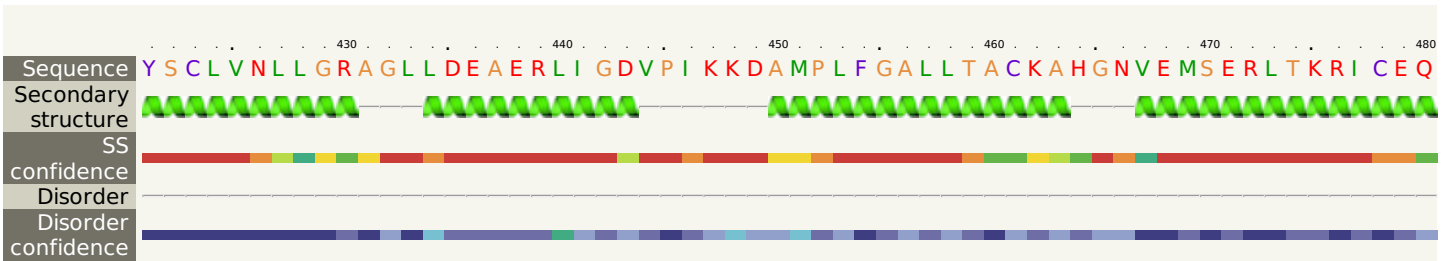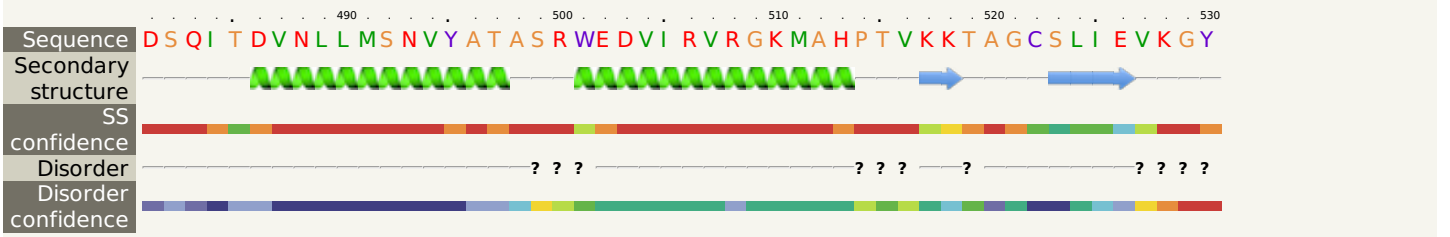

Confidence Key

High(9) Low (0)

? Disordered ( 4%)

Alpha helix ( 69%)

Beta strand ( 3%)
