# Supplementary material
Source: PubMed Central journal article supplement (PMC4125408)
Supplement: a7ea3ce7efcb8386121cc136820f0af2_genetics.114.163931-15.pdf [file a7ea3ce7efcb8386121cc136820f0af2_genetics.114.163931-15.pdf]

**Table S2 The incompletely and completely dominant inheritance of *sped1-D* in different background.**

| Cross combination | Number of F1 plant<br>(Mutant type: wild type) | Number of F2 plant<br>(Mutant type: wild type) | Dominant or recessive |
|-------------------|------------------------------------------------|------------------------------------------------|-----------------------|
| 9311xsped1-D      | 6:0                                            | 252:88                                         | incomplete dominant   |
| R498xsped1-D      | 10:0                                           | 137:43                                         | incomplete dominant   |
| Balilaxsped1-D    | 7:0                                            | 110:39                                         | incomplete dominant   |
| R549xsped1-D      | 9:0                                            | 66:21                                          | complete dominant     |
| R527xsped1-D      | 9:0                                            | 178:53                                         | incomplete dominant   |
| TP309xsped1-D     | 11:0                                           | 112:42                                         | complete dominant     |
| Kitaakexsped1-D   | 6:0                                            | 100:30                                         | complete dominant     |
