# Supplementary material
Source: PubMed Central journal article supplement (PMC4125408)
Supplement: b86b20c8d87b12f2446e53883cba4450_genetics.114.163931-1.pdf [file b86b20c8d87b12f2446e53883cba4450_genetics.114.163931-1.pdf]

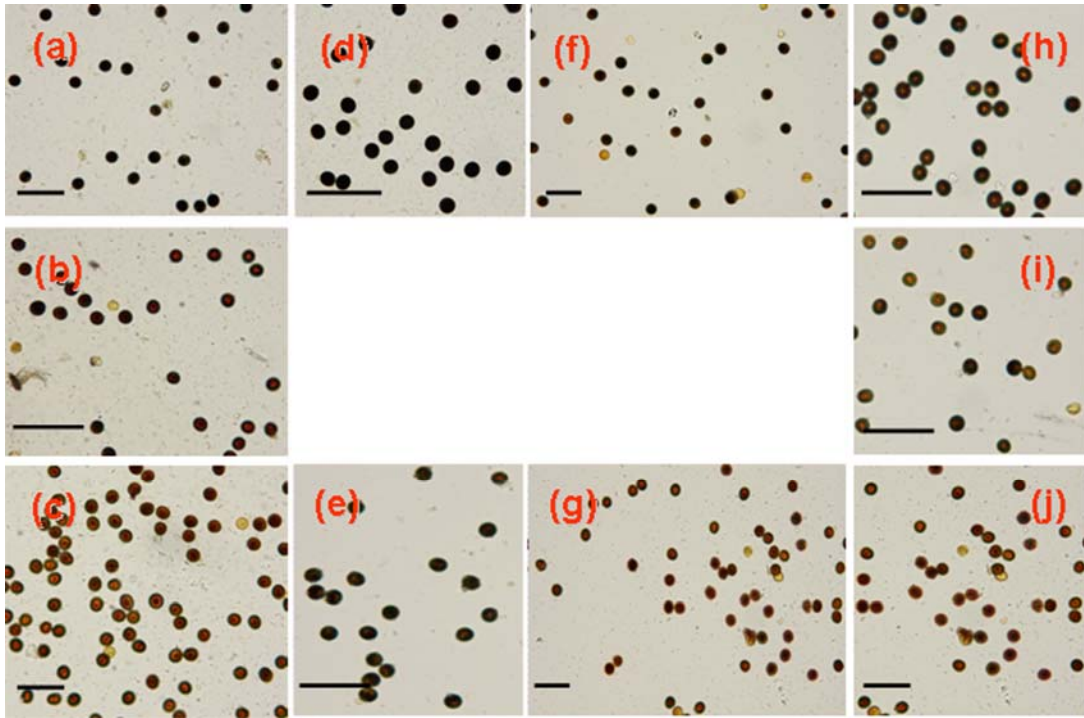

**Figure S1** Pollen viability in *sped1-D*, SPED1-RNAi and control plants. Pollen viability was effected in *sped1-D* (a, 1 spikelet; b, 2 spikelets; c, 3 spikelets) and in TP309 plants containing *sped1-D-OX* plasmid (h, 1 spikelet; i, 2 spikelets; j, 3 spikelets) compared with that of the wild type (d, TP309 and e, 9311); SPED1-silenced plants had very low pollen viability (f, miR528-*sped-1* and g, miR528-*sped-2*). The pollen had low viability and appeared light brown when assessed by staining the starch in the pollen with a 1% I-KI solution; the mature pollen grains from the control and *sped1-D* plants were stained dark brown.

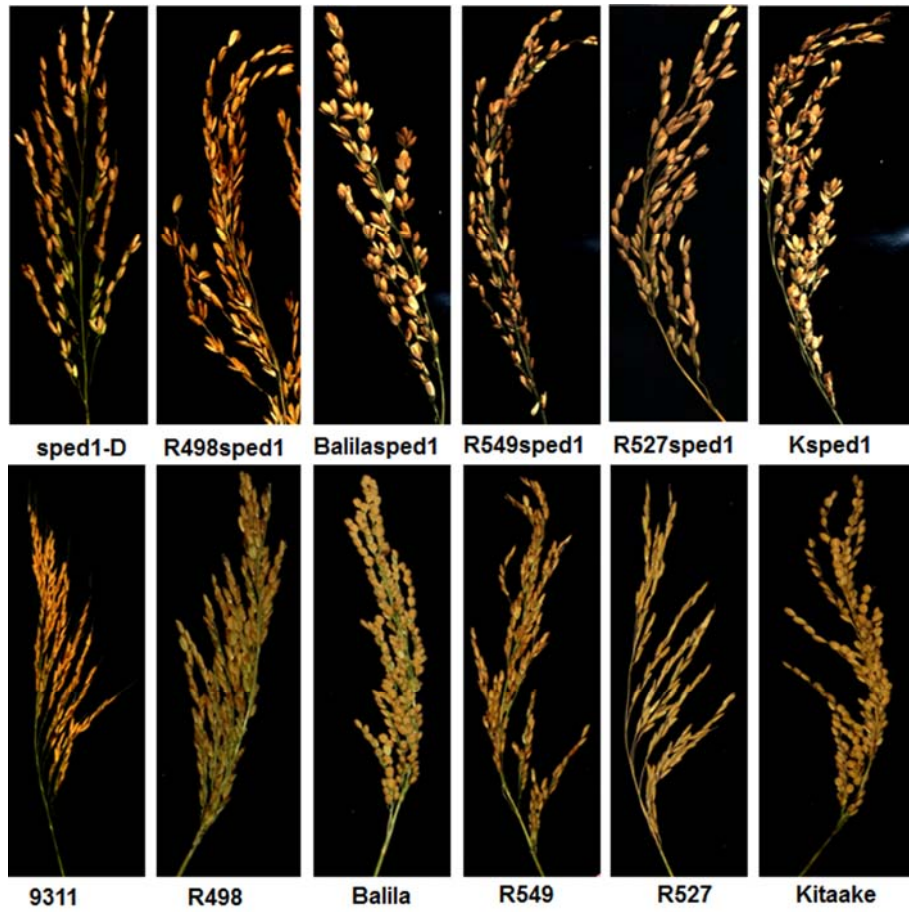

**Figure S2** The phenotype of *sped1-D* isogenic mutants in different genetic backgrounds (Upside is the series isogenic *sped1-D* mutant, below is the corresponding wild type).

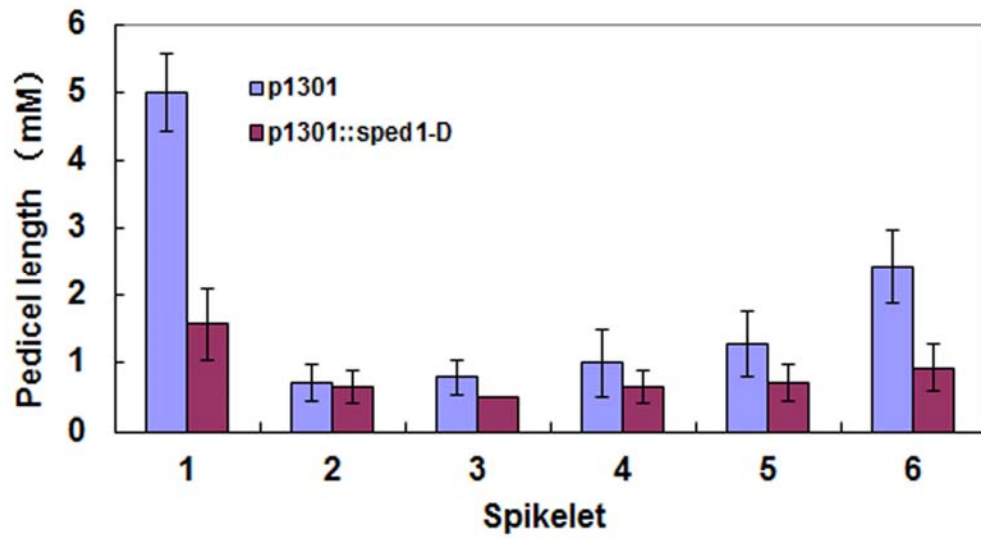

**Figure S3** Statistical analysis of the lengths of six pedicels on secondary branches of a TP309 plant containing p1301-*sped1-D*. Error bars indicate standard error (SE) for seven replicate experiments.

Figure S4

Cleaved sequence (34aa)

**M**AAAAARRGHGMPLWECNVLIRTLARRGSFARVMAVYYDLRARGLVADSFYTPFVLR  
 AVGVLLKLSVEGRKAHAAAVKTGFRWDAYTGS**SSL**MEMYTMLGRVDIARKVFD**EMPSRALV**LV  
 NMMVRCYIRCGWYSA**AVAL**SEQMERSGV (i)  
 TPDRVTLVAVTACSRARDLSLGRRIHVYMDNVFGFNLP**VANALLDMYTKNDCLEEA**VKLF**EQ**  
**MPARNIISW**TLVSGYGLAGQLDKARVLFNQCKEKDL**ILWTAMINACVQHGC**FEEALTLFRDM  
 Q**MQRV** (ii)  
 EPDRFTVVTLTCCANLGALDQGEWIHQYAEQRKMKIDAVLG**TALIDMYSKCGHIEK**SLEVF**W**  
 R**MQGRD** (iii)  
 ATAW**TAIICGLATNGQAGRALE**LFQDMQ**RSKVK**PDGV**VTFIGVL**SACCHGGLVDEGRK**GFHAM**  
 REV (iv)  
 YQIEPRV**EHY**SCLV**NLLGRAGLLDEAERL**IGDV (v)  
 PINKDAMPLFGALLTACKAHGNVEMSERLTRICEQDSQITD**VNLLMSNVYATASRWED**VI**RV**  
 R**GKMAHPTV**KKNAGCSLIEV**KGY**.

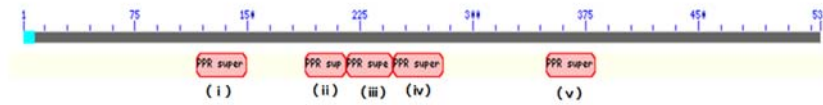

B)

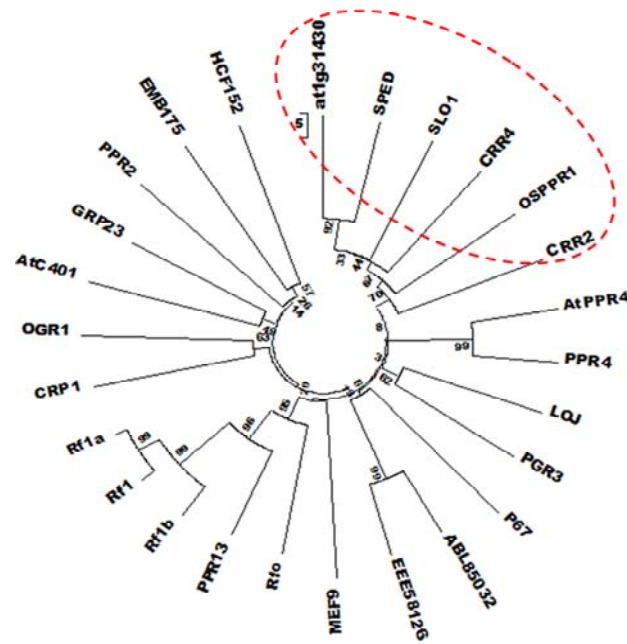

E motif

C)

|           |                                                                                       |
|-----------|---------------------------------------------------------------------------------------|
| sped      | LFGALLTACKAHGNVEMSERLTRICEQDSQITD <b>VNLLMSNVYATASRWED</b> VI <b>RV</b> RGK <b>MA</b> |
| Slo1      | VWGALIFGCRMHGNVEIGEAAKKILFELDPDSGTYVLLDGMYCGANMWEDAKRARRMMN                           |
| MEF9      | VWGALLDACRIYNNVGLAHVAEEMSRLEPESSTHYVLLYNNMYALMGLWDEASQVRMME                           |
| At1g31430 | LFGALLTACKAHGNVEMSERLTRICEQGYQIPD <b>VNLLMSNVYATASRWED</b> AI <b>RV</b> RSK <b>MA</b> |
| CRR4      | IWRITFLTACSHKEFETIGELVAKHILIQAGYNPSSYVLLSNMYAFGMWFDVRRVRTMK                           |

|           |                                                                                        |
|-----------|----------------------------------------------------------------------------------------|
| sped      | HPT <b>V</b> KKNAGCSLIEV <b>KGY</b> -----                                              |
| Slo1      | ER <b>G</b> IPKIFGCSSEI <b>V</b> AGIVCFIVRDKSRPESEKIYDR <b>L</b> HCLGRHMRSSLSVLFSEYEIT |
| MEF9      | SR <b>R</b> IKKERESSW <b>T</b> SS <b>T</b> -----                                       |
| At1g31430 | HPT <b>L</b> KKTAGCSLIEV <b>R</b> GH-----                                              |
| CRR4      | ER <b>K</b> IPKIFGCSSEI <b>L</b> GRVHEFFVDSIEV <b>S</b> STL-----                       |



D)

```

61      70      80      90      100     110     120
|-----|-----|-----|-----|-----|
OsSPED1 VLKLSVEGRKAHAAAVKTGFRHDAYTGSSLHEHYTHLGRVDIARKVFDDEHP*SRALVLWNN
BdSPED1 VLKLSVEGRKAHAAAKTGFHHDAYTASSLHDHYTLLGRADVARKLFDDEHP*RALVWNN
HvSPED1 ALQISVEGRKAHAAATLKTGFRHDAYTASSLHDHYTHLGRLEAARKVFDDEHP*QRAVWNN
SiSPED1 VMKLSVEGRKAHAAAVKTGFRHDAYTASSLHDHYTHLGRADLARKVFDDEHP*RRFLVWNN
SbSPED1 VMKLSVEGRKVHAAAVKTGFRHDAYTASSLLEMYTHLGRVDFARKVFDDEHP*QRFVLWNN
ZnSPED1 THKLSVEGRKVHAAAVKTGFRHDAYTACSLHEHYTHLGRADSARRVFDDEHP*QRFVLWNN
AtSPED1 RLKRVIEGEKVHGYAVKAGLEFDSYVSNLSLHGMYASLGKIEITHKVFDEHP*QRDVWNN
Consensus .#kls!EGrKaHaaavKtGfruD*YtasSL*.HYt.nLGr.#.arkvFDEHPQR.IV.WNN

121     130     140     150     160     170     180
|-----|-----|-----|-----|-----|
OsSPED1 MVR*CYIRCGHYSA*AVALSEQM-ERSGVTPDRVTLVTAVTACSRAR*DL*SLGRRRIHYMDNV
BdSPED1 MIRC*VYRCGRYTA*AIALAE*EH-ERSGLTPDKVTLVTSVTVC*S*RAG*DL*SLGRRRIHAYMDGV
HvSPED1 MLRC*VYRCGRNTE*AVALAE*EH-ERGR*LTPDRVTLTALTAC*S*RAG*DL*SLGRKIHAYMDGV
SiSPED1 MIRC*VYRCGRFTA*AVALAE*EH-ERSGATPDRVTLVTAVTAC*S*RAG*DL*SLGRRIHSYMDAV
SbSPED1 MHRC*YIRCGRFTA*AVALAE*EH-ERSGATPDRVTLVTAVTAC*S*RAG*DL*SLGRIRIAYMDGV
ZnSPED1 MHRC*YIRCGRFTA*AVALAVQH*S-ESGGATPDRVTLVTAVTAC*S*RAG*DL*SLGRRIRIAYMDGV
AtSPED1 LISSVYGNGRFEDAIGVFKRHSQESNLKFD*EGTIVSTLSACSALKNL*EIGERIHYRVVTE
Consensus #ircY!rcGrftaA!alae.#.#rsgltpDrvtLvtavtaCSrag#LslGrrIh.%nd.v

181     190     200     210     220     230     240
|-----|-----|-----|-----|-----|
OsSPED1 FGFNLPVANALLDMYTKNDCLEAVKLFEQMPARNIISWTLVSGYGLAGQLDKARVLFN
BdSPED1 FGFSLPVANALLDMYKNGCLEAVKLFEQMPARNIISWTLVSGYAFAGQLDKARVLFY
HvSPED1 TGFSLPVANALLDMYKNGCLEAVNLFKHPSRNVVSWTLVSGYAFAGQVQDKARLLFH
SiSPED1 FGFNLPVANALLDMYTKNDCLEAVKMFQMPERNIISWTLVSGYALAGQLDKARALFY
SbSPED1 FGFSLPVANALLDMYTKNGYLEAVKMFQMPERNIISWTLVSGYAVAGQLDKARMLFY
ZnSPED1 FGFSLPVANALLDMYTKNGYLEAVKMFQMPERNIISWTLVSGYIGAGQLDKARVFFY
AtSPED1 FEMSVRIGNALVDMFCCKGCLDKARAVFDSHRDKNVKCHTSHVFGYVSTGRIDEARVLE
Consensus fgfslp!aNALLDH%.KngcL.#eAvk.F#qHp.rn!isWtl!vSgy...aGqlDkArvlf.

241     250     260     270     280     290     300
|-----|-----|-----|-----|-----|
OsSPED1 QC*KEKDLILHTAHINACVQHGC*FEEALTLFRDMHQ*RV*EPDR*FTVVTLLTCCANL*GALDQ
BdSPED1 QCSEKDLIMHTAHINACVQHGC*FEEALSLFREHMQR*VEPDR*FTIVTLLTCCANL*GALDQ
HvSPED1 QC*TEKDLIMHTAHINAYVQHGC*FEALSLFRDMHQ*HQ*IEPDR*FTVVTLLTCCANL*GALDQ
SiSPED1 QC*TEKDLILHTAHINACVQDGS*FEEALSLFRDMQL*RV*EPDR*FTVVTLLTCCANIG*TLDQ
SbSPED1 QC*TQKDLILHTAHINACVQHGS*FEEALTLFRDMQL*RV*EPDK*FTVVTLLTCCANIG*ALDQ
ZnSPED1 QC*TQKDLILHTSMINACVQHGS*FEEALILFRDMQL*RV*EPDK*FTVVTLLTCCANIG*ALDQ
AtSPED1 RSPVKD*VVLHTAHMNGYVQFNRFDEALELFRCHQ*TAGIRP*DNFVLVSLLTGCAQT*GALDQ
Consensus qc.eKDl!#HTaMiNacVQhg.FeEAL.LFRDMQ.qr!ePDrFtvvtLLTcCa#.GaL#Q

301     310     320     330     340     350     360
|-----|-----|-----|-----|-----|
OsSPED1 GE*WIHQYAEQRKHKIDAVLGTALIDMYSKCGHIEKSL*EVFWRHQGR*DAT*HTAI*ICGLAT
BdSPED1 GE*WIHQFAVDRKHKVD*AVLGTALIDMYAKCGHVKKSMEV*FEQHQGR*DT*HTSI*ICGLAT
HvSPED1 GQLI*HQFAEGRN*MKLD*AVLGTALIDMYAKCGHVEK*SV*EVFERNEGR*DT*HTAI*ICGLAT
SiSPED1 GE*WIHQYAEGRKHKIDAVLGTALIEHYSKCGHVOKALDV*FERHQGR*DAA*HTAI*ICSLAT
SbSPED1 GE*WIHQYAEGRN*MKIDAVLGTALIEHYSKCGHVOKSLQ*IFGRHQGR*DAA*HTAI*ICGLAT
ZnSPED1 GE*WIHQYAESRN*MKIDAVLGTALIEHYSKCGHVOKSLQ*IFGRHQGR*DAA*HTAI*ICGLAT
AtSPED1 GK*WIHQYINENRVTVDKVVGTALVDHYAKCGCIETALEV*FYEIKER*DT*ASHT*SLIYGLAM
Consensus GeWIHQ%ae.r.nk.DaVlGTAL!#HYaKCGH!eks!#F.rnqgrDtAaHTaiIcGLat

361     370     380     390     400     410     420
|-----|-----|-----|-----|-----|
OsSPED1 NGQAGRALELFDHQRSKVKPDGVTTFIGVLSACCHGGLVDEGRKQF*HAHRE*VYQIE*PRVE
BdSPED1 NGQAGRALELFDHMER*SKVKPDSITTFIGVLSACCHGGLVDEGRKQF*HAHKOV*YRIP*PRIE
HvSPED1 NGQAGRALELFDHMERSEAK*PD*SVTTFIGVLSACCHGGLVDEGRKQF*HAHKEV*YRIP*PRVE
SiSPED1 HGQASRALELFEEMQISKVKPDGITTFIGVLSACCHGGLVDEGRRH*FQAHKEV*YRIP*PRIE
SbSPED1 NGQASKALELFEEMQSKTKPDGITTFIGVLSACCHGGLVDEGRRH*FQAHKEI*YQIE*PRIE
ZnSPED1 NGQASKALELFEEMQSKTKPDGITTFIGVLSACCHGGLVDEGRY*FQAHKEV*YHIE*PRIE
AtSPED1 NGMSGRA*LDLYYEMENVGVRLDAITFVAVLTACN*HGGFVAEGR*KIFH*SH*TERHN*VQPKSE
Consensus nGqagrAL#LXe#H#rskvkpD.!TF!gVLSACcHGGlVdEGrk.FhaHk#vy.!Pr.E

```

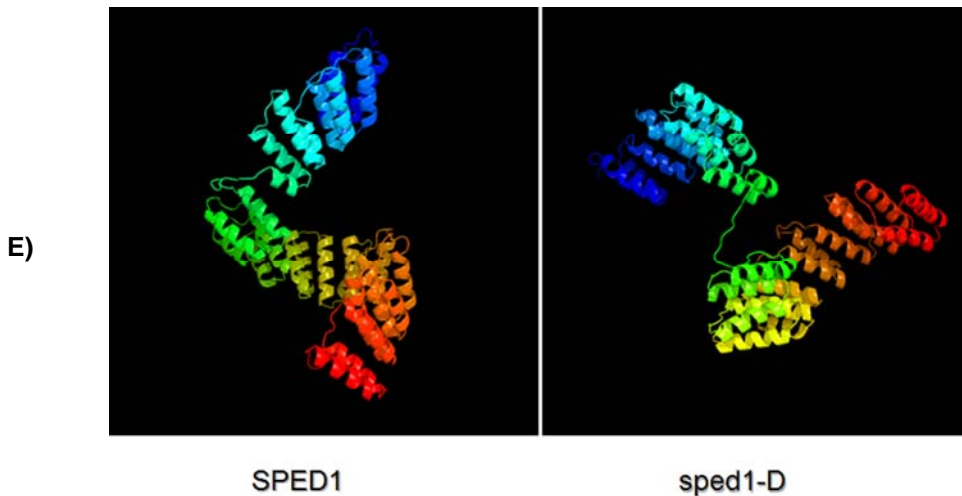

**Figure S4** Sequence and structure of SPED 1

A) SPED 1 is a PPR protein containing 12 PPR motifs. The positions of the two changed amino acid, K70T and 414L in sped1-D are indicated by asterisks.

B) Phylogenetic analysis showed that SPED or sped has the highest sequence similarity with at1g31430 and SLO1 in Arabidopsis. Sequences used in this analysis were as follows: At1g31430, MEF9 (At1g62260), SLO1 (At2G22410), CRR4 (At2g45350), CRR2-At3g46790, AtPPR4 (At5g04810), LOJ (At2g39230), PGR3 (At4g31850), P67 (At4g16390), AtC401 (At5g21222), GRP23 (At1g10270), EMB175 (At5g03800) and HCF152 (At3g09650) from Arabidopsis; sped (NP\_001057989), OSPPR1 (AAS93059), Rf1a (ABC42330), Rf1b (ABC42331), EEE58126 and OGR1 (ACL79585) from rice; PPR4 (NP\_001105869), CRP1(NP\_001105879 ) and PPR2 (ACG30078) from maize; ABL85032 from *Brachypodium sylvaticum*; Rfo (ACJ70132) from *Brassica napus*; PPR13 (XP\_002436844 ) from sorghum; and Rf1 (AAM52341) from petunia.

C) Sequence alignment of sped 1, Slo1, MEF9, At1g31430 and CRR4 also showed that the sped 1 contains a truncated E motif.

D) Protein sequence alignment of SPED1 homologs from Arabidopsis (AtSPED1, At1g31430), *Setaria italic* (SiSPED1, XP\_004967201.1), *Sorghum bicolor* (SbSPED1, XP\_002438633), *Zea mays* (ZmSPED1, AFW76438) and *Brachypodium distachyon* (BdSPED1, XP\_003563682). The two changed amino acid, K70T and I414L in sped1-D are both located in a conservative domain. Their positions are indicated by asterisks.

E) Prediction of 3-D structures of SPED1 and sped1-D proteins by using phyre2.

A)

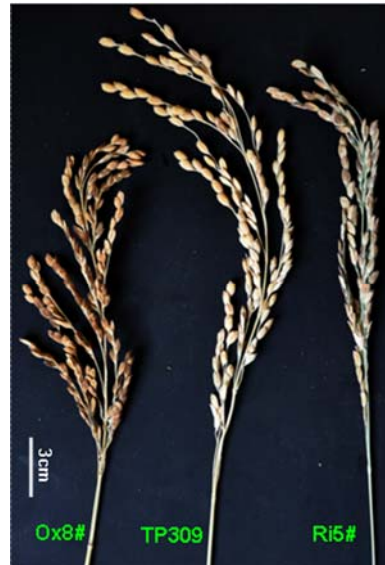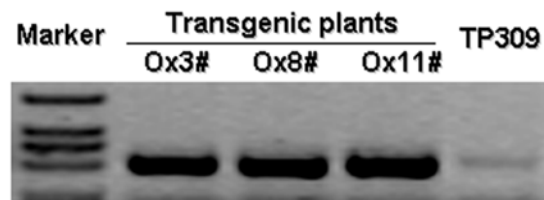

B)

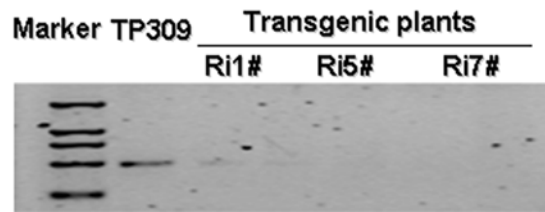

**Figure S5** The phenotypes of TP309 plants containing SPED-OX or miR528-sped-2.

A) Two to three spikelets clustered in TP309 transgenic plant #8 containing *SPED-OX*; Statistical analysis of the spikelet sterility of TP309 transgenic plant containing *miR528-sped-2* showed that the number of fertile spikelets or grain yield per panicle was about reduced to 5% (The phenotype of Ri5# is shown).

B) RT-PCR analysis showed that the expression levels of *SPED1* are much higher in plants with *SPED-OX*, while they are lower in plants with *miR528-sped-2* than that in TP309

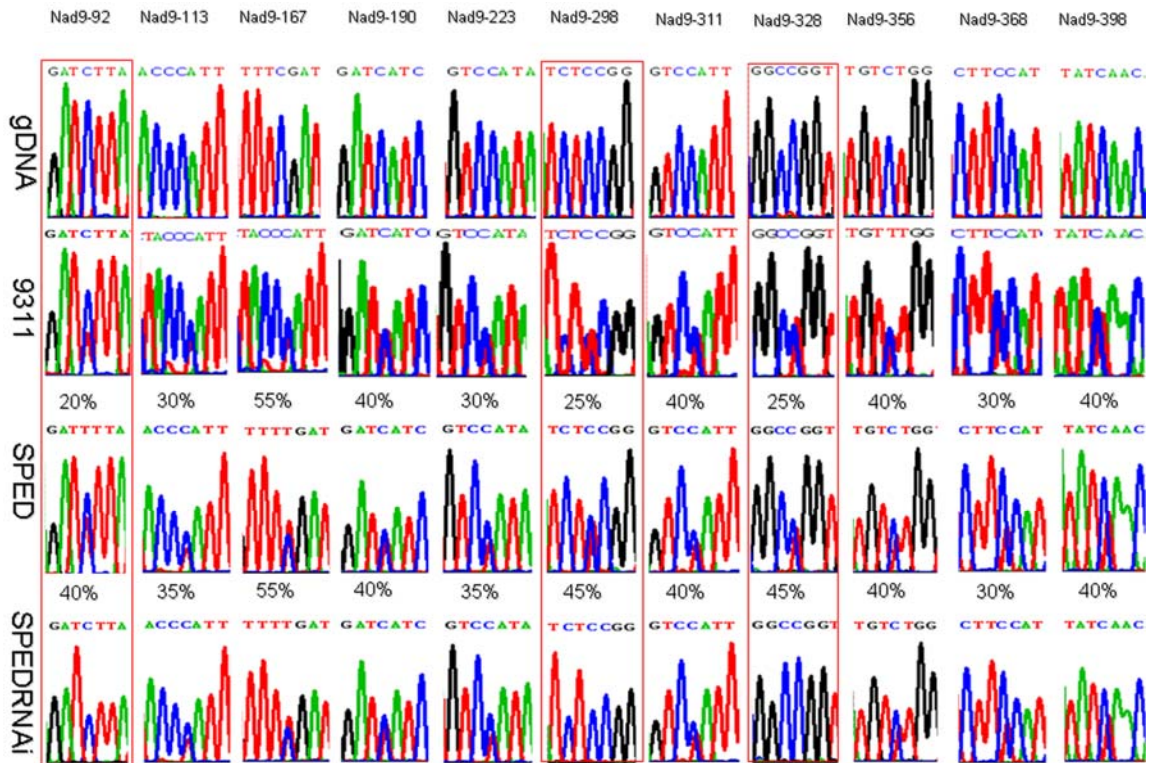

**Figure S6** SPED is involved in the editing of Nad9 gene. RT-PCR products containing the 11 partial editing sites of Nad9 gene were directly sequenced. Besides the editing efficiency of C92, C298 and C328 are 50% increase in average in SPED plant, that of all the 11 sites are increased to 70-80% in sped-RNAi plant. Asterisks indicate the editing sites.



**Table S1** Nine plant hormones that were examined to determine the effects of hormones on the elongation of *sped1-D*'s pedicels and peduncles.

| Phytohormone    | Concentration                | Panicle type      |
|-----------------|------------------------------|-------------------|
| IAA             | 20mg/L and 150mg/L           | Clustered panicle |
| ZT              | 20mg/L and 150mg/L           | Clustered panicle |
| ABA             | 20mg/L and 150mg/L           | Clustered panicle |
| 6-BA            | 20mg/L and 150mg/L           | Clustered panicle |
| NAA             | 20mg/L and 150mg/L           | Clustered panicle |
| Epibrassinolide | 0.01mg / L                   | Clustered panicle |
| Cytokinin       | 0.001g/L                     | Clustered panicle |
| 2, 4-D          | 40ppm, 80ppm, 120ppm, 160ppm | Clustered panicle |
| GA3             | 50mg/L, 100mg/L, 150mg/L     | Clustered panicle |

**Table S2 The incompletely and completely dominant inheritance of *sped1-D* in different background.**

| Cross combination | Number of F1 plant<br>(Mutant type: wild type) | Number of F2 plant<br>(Mutant type: wild type) | Dominant or recessive |
|-------------------|------------------------------------------------|------------------------------------------------|-----------------------|
| 9311xsped1-D      | 6:0                                            | 252:88                                         | incomplete dominant   |
| R498xsped1-D      | 10:0                                           | 137:43                                         | incomplete dominant   |
| Balilaxsped1-D    | 7:0                                            | 110:39                                         | incomplete dominant   |
| R549xsped1-D      | 9:0                                            | 66:21                                          | complete dominant     |
| R527xsped1-D      | 9:0                                            | 178:53                                         | incomplete dominant   |
| TP309xsped1-D     | 11:0                                           | 112:42                                         | complete dominant     |
| Kitaakexsped1-D   | 6:0                                            | 100:30                                         | complete dominant     |

**Table S3** Molecular markers used for map-based cloning of *sped1-D* gene.

| Molecular Marker | Forward primer (F)       | Reverse primer (R)       |
|------------------|--------------------------|--------------------------|
| RM5957           | ACTGCTGCACTGCACAAGAC     | AGCTAGCTAGGCGTGAGCTG     |
| RM3287           | GGACGGATTGTAGGTAGGAC     | CCTTTCTTCAATCTGCATTC     |
| RM275            | GCATTGATGTGCCAATCG       | CATTGCAACATCTTCAACATCC   |
| RM20384          | TCAGATCACTGTGCTCCAATCC   | TCTATCTATCATGCCGACCTTGC  |
| RM20297          | TTGGCACGGCCATATAACAAGC   | AAGTTGATGGCCTTTGGTTTGC   |
| RM20311          | ATAATTCATCCGGCCACCAACACC | CTCCGGGACAAGGTTGCTGAGG   |
| RM20315          | CGTCCTCCAGGAAACCCTGTAAGC | CAGAAACTCGCCGAAGCAGAGC   |
| RM1340           | TCCAAACTAGTGGGAACGC      | CTCAACGCCATGAACCTC       |
| RM20303          | ACCTCCGCGTCGTAGAAGTAGC   | CAAACCCAAACCCAAGGAGAGG   |
| CSP1             | AGGCTTCTTGAATGGAAGTGC    | GGAATATACGTGGATGTGAGAGG  |
| CSP4             | AGCGTCCTTCTCCATCAT       | TTTGTCACTTGTCCCCTA       |
| CSP7             | TGTGACAGCATAGGAGTG       | AGGAGTAGCTTTTGGTTC       |
| CSP8             | ACGCCTCTCCTTACAGCT       | GTATTCCCCTCTCCAGTACG     |
| CSP25            | TGCCAGTGCCAGCCATCAAAC    | GCCAAGCCGGTGCAGCAGG      |
| CSP30            | CAATTGCGGCCCTATGAT       | GGCGGCCGAGCTGGTGGAC      |
| CSP320B          | CAATGAGGGAGGTTTATCAGC    | CCAAACAGTGGCATAGCATCCTTT |

**Table S4 Flowering-related genes used for RT-PCR analysis.**

| Gene            | Forward primer          | Reverse primer           | Annealing temperature (°C) | PCR fragment (bp) |
|-----------------|-------------------------|--------------------------|----------------------------|-------------------|
| <i>RFL</i>      | CAGAGGGAGCATCCTTTCGTG   | CGCATCTGGGGCTTGTGA       | 62                         | 227               |
| <i>FCP1</i>     | GTCTCATGGGATTCTGGGT     | GTACACGATTGAGGCGCGG      | 62                         | 626               |
| <i>OMADS3</i>   | CCTGTTGCTGCTTCTGCC      | CGGTTGCTGCTGTTCTCG       | 62                         | 264               |
| <i>OsWUS</i>    | CCGCATCGAGGCAAGAA       | GCCGACTGGGAAGAGTGGA      | 62                         | 397               |
| <i>WOX3</i>     | TCGACCACGCTAATTCCTTCT   | CATGCTGCTCTTCTTGAGGC     | 62                         | 438               |
| <i>OSH1</i>     | AAGGTAACAACAAGGCACA     | GCTCAAGACACGCAGGATA      | 62                         | 201               |
| <i>Fon4</i>     | TGTTTGGTGGTTGCATGGTGTT  | TGCTTCGCTTCGGCTCTGTC     | 52                         | 146               |
| <i>Fon1</i>     | GGATCAGGCACCGGAACA      | AGCCGTAGGAGCCAGCAAT      | 60                         | 348               |
| <i>Fon2</i>     | GTTAGCCGAAGACGAAGC      | TCCACTATGCAGGAGCAG       | 58                         | 382               |
| <i>OsMADS6</i>  | CACCAGCAACTACAGAGCC     | CCACGCAAGACCATTAGG       | 55                         | 341               |
| <i>OsPck1</i>   | GTTACTGAAGAATAAAAAAT    | GATCAAATCAAGATGCTTTC     | 43                         | 253               |
| <i>OsMe1</i>    | CGCCGCGGAGGTCAAATTTT    | ATGCTGCCATTACAATGGG      | 55                         | 265               |
| <i>OsRAA1</i>   | ATGTCAGGGGTTTGGGTGTTT   | GCGCTCGACGACGCGGAAGGA    | 52                         | 340               |
| <i>LAX1</i>     | TTCCTCAAGGCGCAGGTCA     | ATCTCCAGCGTCGTCATCCC     | 55                         | 176               |
| <i>SP1</i>      | CGGTAACCAAGAGGAAACAAGTG | CACCACGCACAGTAGCACCTT    | 56                         | 246               |
| <i>APO1</i>     | CCGCCGCCCCGACCTCCATCATC | CTCCACCAGCGCCGGCGACCTCAG | 62                         | 317               |
| <i>AK070205</i> | GCCACTGCGCCAACCTGCTCTC  | TGTCCGATTGCTTGCTTGATGC   | 56                         | 402               |
| <i>AK106784</i> | TCGTCGTCGGCTGTCTTCCACTG | GCGCTCGCGGCTGCTCCATC     | 62                         | 329               |
| <i>AK120659</i> | ACCAACGGCCGCCCCCTCTCG   | CGCCCCCTCCCCGCATCTCG     | 62                         | 404               |
| <i>SPEDJ</i>    | GAAGCAATCCATGCAATGAGG   | GGTCCAGTCAAATAATGG       | 60                         | 450               |
| <i>HYG</i>      | GACGGTGTCTCCATCACAGTTT  | ACTCACCGCGAGTCTGTGAGAA   | 56                         | 495               |
| <i>Actin</i>    | AGCAACTGGGATGATATGGA    | CAGGGCGATGTAGGAAAGC      | 56                         | 450               |

**Table S5 Rice materials used in this study**

| Rice variety and material | Rice type       | Inflorescence phenotype | Genotypes | Source or reference                                                          |
|---------------------------|-----------------|-------------------------|-----------|------------------------------------------------------------------------------|
| 9311                      | <i>Indica</i>   | Normal                  | Sped1     | Restorer line (Yu <i>et al.</i> 2002)                                        |
| TP309                     | <i>Japonica</i> | Normal                  | Sped1     | Taipei 309 (SONG <i>et al.</i> 1995)                                         |
| R948                      | <i>Indica</i>   | Normal                  | Sped1     | Restorer line, from Sichuan Agricultural University, China                   |
| R549                      | <i>Indica</i>   | Normal                  | Sped1     | Restorer line, from Sichuan Agricultural University, China                   |
| Ballila                   | <i>Japonica</i> | Normal                  | Sped1     | Introduced from Itali (JI <i>et al.</i> 2012)                                |
| R527                      | <i>Indica</i>   | Normal                  | Sped1     | Restorer line, from Sichuan Agricultural University, China                   |
| Kitaake                   | <i>Japonica</i> | Normal                  | Sped1     | Introduced from USA (CHEN <i>et al.</i> 2014)                                |
| sped1-D                   | <i>Indica</i>   | clustered spikelets     | sped1-D   | The rice spontaneous mutant of 9311(This study)                              |
| Tsped1                    | <i>Japonica</i> | clustered spikelets     | sped1-D   | BC3 plant from the backcross of TP309 with sped1-D.This study (This study)   |
| R948sped1                 | <i>Indica</i>   | clustered spikelets     | sped1-D   | BC3 plant from the backcross of R948 with sped1-D.This study (This study)    |
| R549sped1                 | <i>Indica</i>   | clustered spikelets     | sped1-D   | BC3 plant from the backcross of R549 with sped1-D.This study (This study)    |
| Ballilasped1              | <i>Japonica</i> | clustered spikelets     | sped1-D   | BC3 plant from the backcross of Ballila with sped1-D.This study (This study) |
| R527sped1                 | <i>Indica</i>   | clustered spikelets     | sped1-D   | BC3 plant from the backcross of R527 with sped1-D.This study (This study)    |
| Ksped1                    | <i>Japonica</i> | clustered spikelets     | sped1-D   | BC3 plant from the backcross of Kitaake with sped1-D (This study)            |



**Files S1-S4**

Available for download at <http://www.genetics.org/lookup/suppl/doi:10.1534/genetics.114.163931/-/DC1>

**File S1** 672 genes that were up-regulated in *sped1-D* plant.

**File S2** 574 genes that were down regulated in *sped1-D* plant.

**File S3** Secondary structure and disorder prediction of SPED1.

**File S4** Secondary structure and disorder prediction of *sped1-D*.

## References

- CHEN, X., S. ZUO, B. SCHWESSINGER, M. CHERN, P. E. CANLAS *et al.*, 2014 An XA21-Associated Kinase (OsSERK2) Regulates Immunity Mediated by the XA21 and XA3 Immune Receptors. *Mol Plant* **7**: 874-892.
- Ji, Q., M. ZHANG, J. LU, H. WANG, B. LIN *et al.*, 2012 Molecular basis underlying the S5-dependent reproductive isolation and compatibility of indica/japonica rice hybrids. *Plant Physiol* **158**: 1319-1328.
- SONG, W. Y., G. L. WANG, L. L. CHEN, H. S. KIM, L. Y. PI *et al.*, 1995 A receptor kinase-like protein encoded by the rice disease resistance gene, Xa21. *Science* **270**: 1804-1806.
- YU, J., S. HU, J. WANG, G. K. WONG, S. LI *et al.*, 2002 A draft sequence of the rice genome (*Oryza sativa* L. ssp. indica). *Science* **296**: 79-92.
