# Supplementary material
Source: PubMed Central journal article supplement (PMC4125408)
Supplement: efc96881482f6d8b9325add8399ad3c9_genetics.114.163931-3.pdf [file efc96881482f6d8b9325add8399ad3c9_genetics.114.163931-3.pdf]

A)

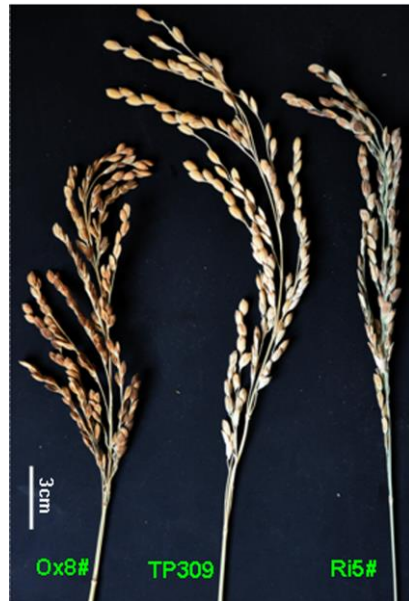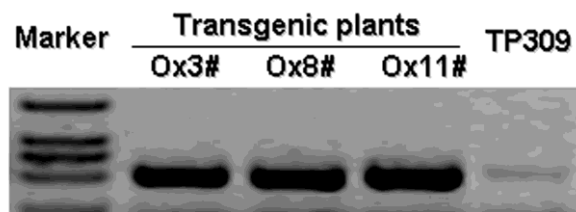

B)

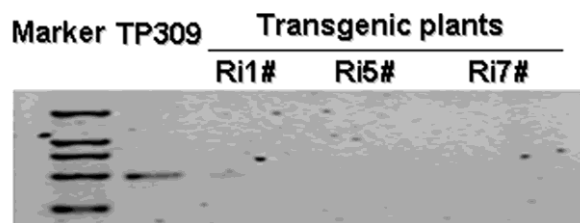

**Figure S5** The phenotypes of TP309 plants containing SPED-OX or miR528-sped-2.

A) Two to three spikelets clustered in TP309 transgenic plant #8 containing *SPED-OX*; Statistical analysis of the spikelet sterility of TP309 transgenic plant containing *miR528-sped-2* showed that the number of fertile spikelets or grain yield per panicle was about reduced to 5% (The phenotype of Ri5# is shown).

B) RT-PCR analysis showed that the expression levels of *SPED1* are much higher in plants with *SPED-OX*, while they are lower in plants with *miR528-sped-2* than that in TP309
