# Supplementary material
Source: PubMed Central journal article supplement (PMC4125408)
Supplement: f0dcaf59ea9e7b7a7d2224b7387c50b8_genetics.114.163931-9.pdf [file f0dcaf59ea9e7b7a7d2224b7387c50b8_genetics.114.163931-9.pdf]

**Table S5 Rice materials used in this study**

| Rice variety and material | Rice type       | Inflorescence phenotype | Genotypes | Source or reference                                                          |
|---------------------------|-----------------|-------------------------|-----------|------------------------------------------------------------------------------|
| 9311                      | <i>Indica</i>   | Normal                  | Sped1     | Restorer line (Yu <i>et al.</i> 2002)                                        |
| TP309                     | <i>Japonica</i> | Normal                  | Sped1     | Taipei 309 (SONG <i>et al.</i> 1995)                                         |
| R948                      | <i>Indica</i>   | Normal                  | Sped1     | Restorer line, from Sichuan Agricultural University, China                   |
| R549                      | <i>Indica</i>   | Normal                  | Sped1     | Restorer line, from Sichuan Agricultural University, China                   |
| Ballila                   | <i>Japonica</i> | Normal                  | Sped1     | Introduced from Itali (JI <i>et al.</i> 2012)                                |
| R527                      | <i>Indica</i>   | Normal                  | Sped1     | Restorer line, from Sichuan Agricultural University, China                   |
| Kitaake                   | <i>Japonica</i> | Normal                  | Sped1     | Introduced from USA (CHEN <i>et al.</i> 2014)                                |
| sped1-D                   | <i>Indica</i>   | clustered spikelets     | sped1-D   | The rice spontaneous mutant of 9311(This study)                              |
| Tsped1                    | <i>Japonica</i> | clustered spikelets     | sped1-D   | BC3 plant from the backcross of TP309 with sped1-D.This study (This study)   |
| R948sped1                 | <i>Indica</i>   | clustered spikelets     | sped1-D   | BC3 plant from the backcross of R948 with sped1-D.This study (This study)    |
| R549sped1                 | <i>Indica</i>   | clustered spikelets     | sped1-D   | BC3 plant from the backcross of R549 with sped1-D.This study (This study)    |
| Ballilasped1              | <i>Japonica</i> | clustered spikelets     | sped1-D   | BC3 plant from the backcross of Ballila with sped1-D.This study (This study) |
| R527sped1                 | <i>Indica</i>   | clustered spikelets     | sped1-D   | BC3 plant from the backcross of R527 with sped1-D.This study (This study)    |
| Ksped1                    | <i>Japonica</i> | clustered spikelets     | sped1-D   | BC3 plant from the backcross of Kitaake with sped1-D (This study)            |
